# Supplementary material for: Splanchnic Nerve Modulation Effects on Surrogate Measures of Venous Capacitance
Source: PubMed Central journal article supplement — J Am Heart Assoc. 2023 Jul 14;12(14):e028780. doi: 10.1161/JAHA.122.028780 (PMC10382122; doi:10.1161/jaha.122.028780), 2023-07-14
Supplement: JAH3-12-e028780-s001.pdf [file JAH3-12-e028780-s001.pdf]

# **SUPPLEMENTAL MATERIAL**

**Table S1. Changes in baseline hemodynamics and venous capacitance surrogates according to the intervention.**

|                                                       | Bilateral SNM (n=5) |             |         | Unilateral SNM (n=10) |             |         |
|-------------------------------------------------------|---------------------|-------------|---------|-----------------------|-------------|---------|
|                                                       | Pre-SNM             | Post-SNM    | P-value | Pre-SNM               | Post-SNM    | P-value |
| <b>Baseline Hemodynamics</b>                          |                     |             |         |                       |             |         |
| • HR (BPM)                                            | 76 ± 13             | 86 ± 22     | 0.118   | 56 ± 12               | 56 ± 11     | 0.914   |
| • SBP (mmHg)                                          | 128 ± 24            | 108 ± 21    | 0.213   | 135 ± 17              | 129 ± 17    | 0.155   |
| • DBP (mmHg)                                          | 72 ± 9              | 58 ± 10     | 0.059   | 79 ± 13               | 73 ± 12     | 0.047   |
| • PP (mmHg)                                           | 56 ± 20             | 50 ± 15     | 0.524   | 56 ± 12               | 56 ± 11     | 0.914   |
| • RA (mmHg)                                           | 12.0 ± 5.9          | 6.2 ± 5.3   | 0.005   | 14.7 ± 2.7            | 9.9 ± 2.9   | 0.001   |
| • PCWP (mmHg)                                         | 22.6 ± 4.4          | 12.6 ± 5.7  | 0.001   | 31.1 ± 7.5            | 24.2 ± 8.7  | 0.001   |
| <b>IVC Changes</b>                                    |                     |             |         |                       |             |         |
| • IVC diameter (cm)                                   | 1.5 ± 0.5           | 1.1 ± 0.79  | 0.066   | 1.6 ± 0.6             | 1.4 ± 0.5   | 0.187   |
| • IVC collapsibility (decrease >50% with inspiration) | 3 (60%)             | 4 (80%)     | 0.37    | 2 (20%)               | 7 (70%)     | 0.015   |
| • IVC diameter/RAP                                    | 0.14 ± 0.04         | 0.21 ± 0.07 | 0.083   | 0.11 ± 0.04           | 0.15 ± 0.05 | 0.058   |
| <b>Self-reported Bendopnea</b>                        | 1 (20%)             | 0 (0%)      | 0.374   | 6 (60%)               | 2 (20%)     | 0.037   |
| <b>Hemoconcentration</b>                              |                     |             |         |                       |             |         |
| • Hb at rest (g/dL)                                   | 13.5 ± 0.9          | 13.1 ± 0.9  | 0.16    | 12.6 ± 1.7            | 12.6 ± 1.6  | 1.00    |
| • Hb at peak exercise (g/dL)                          | 13.9 ± 1.1          | 13.5 ± 1.0  | 0.087   | 13.3 ± 2.0            | 13.1 ± 1.8  | 0.056   |
| • Hb changes after exercise (g/dL)                    | 0.5 ± 0.4           | 0.4 ± 0.5   | 0.746*  | 0.7 ± 0.5             | 0.5 ± 0.4   | 0.019*  |

Data are presented as mean ±SD. Asterisk (\*) indicates p-values calculated from repeated measures models. BP: blood pressure; Hb: hemoglobin; HR: heart rate; IVC: inferior vena cava; MAP: mean arterial pressure; PCWP: pulmonary capillary wedge pressure; PP: pulse pressure; RA: right atrial pressure; SBP: systolic blood pressure; SNM: splanchnic nerve modulation.

Figure S1. Flow diagram of study protocol.

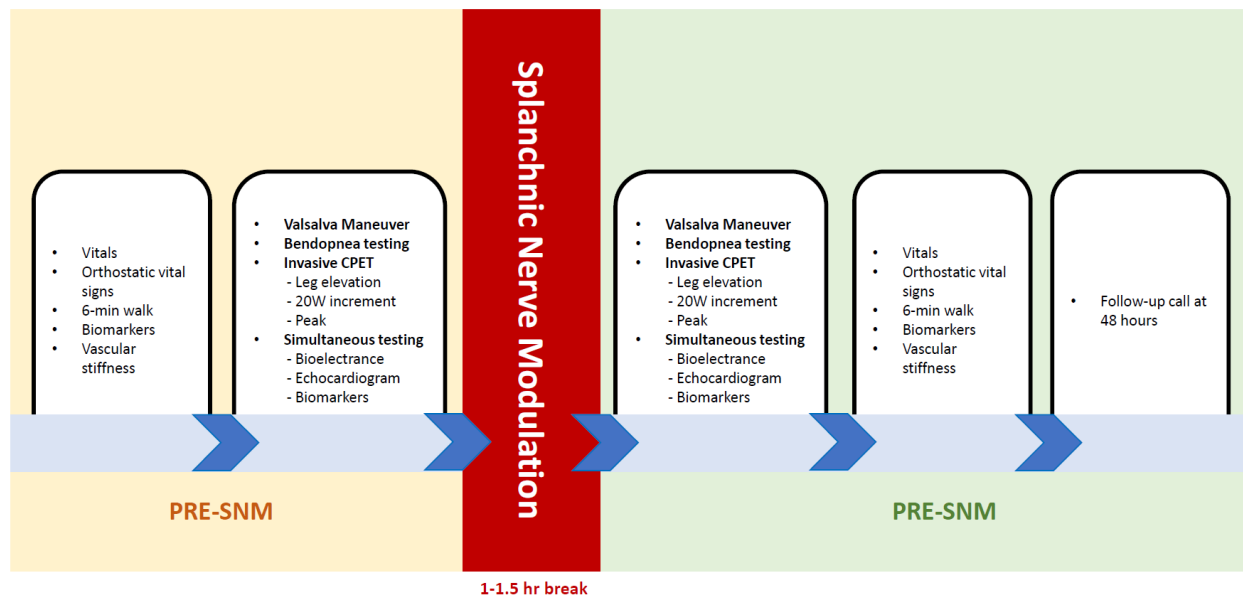

CPET: cardiopulmonary exercise stress test; SNM: splanchnic nerve modulation.

Figure S2. Individual changes in blood pressure during the Valsalva maneuver.

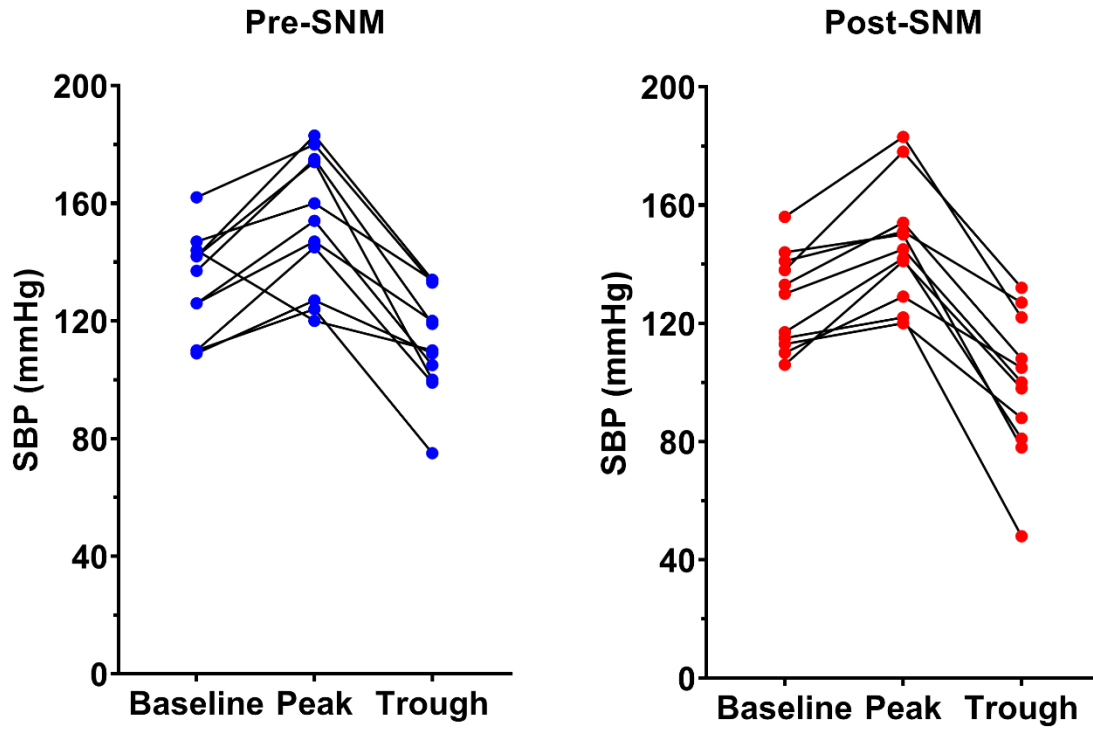

SBP: systolic blood pressure; SNM: splanchnic nerve modulation.

Figure S3. Least-Square means plots for changes in blood pressure during the Valsalva maneuver.

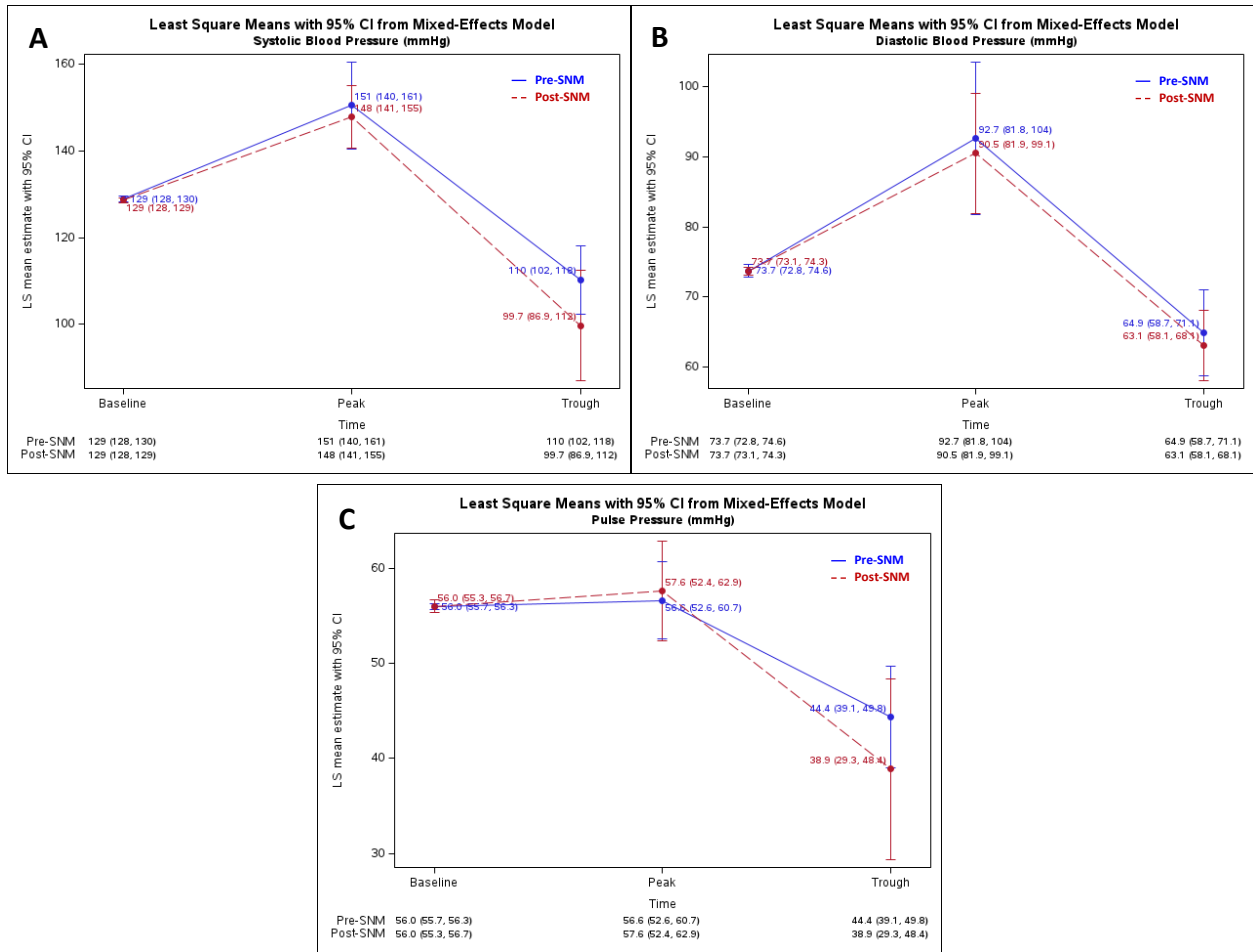

A) systolic blood pressure, B) diastolic blood pressure, C) pulse pressure. CI: confidence interval; LS: least square; SNM: splanchnic nerve modulation.

Figure S4. Least-Square means plots for changes in hemoglobin levels during exercise.

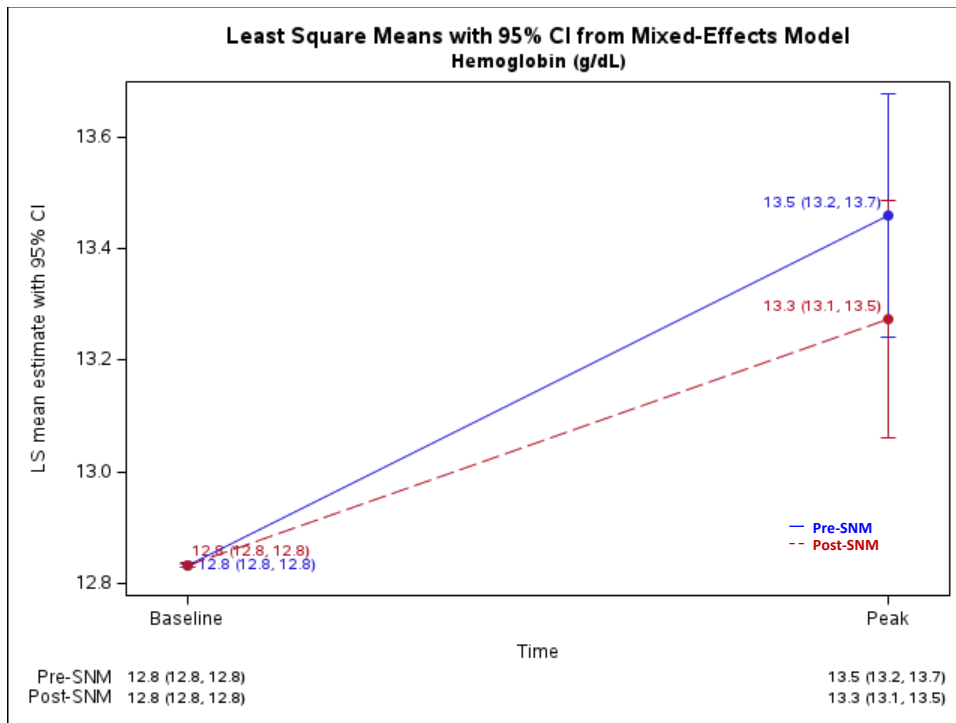

CI: confidence interval; LS: least square; SNM: splanchnic nerve modulation.
